# Supplementary material for: Takeover Quality: Assessing the Effects of Time Budget and Traffic Density with the Help of a Trajectory-Planning Method
Source: Hindawi journal article supplement (doi:10.1155/2020/6173150), 2020-07-01
Supplement: f1 [file 6173150.f1.docx]

**Supplementary Materials**

*Figure S1*. The road layout for take-over Scenario 2 (time budget = 5 s, traffic density = low).

*Figure S2*. The road layout for take-over Scenario 3 (time budget = 7 s, traffic density = medium).

*Figure S3*. The road layout for take-over Scenario 4 (time budget = 7 s, traffic density = low).

*Figure S4*. The road layout for take-over Scenario 5 (time budget = 20 s, traffic density = medium).

*Figure S5*. The road layout for take-over Scenario 6 (time budget = 20 s, traffic density = low).

Table S1

*Descriptive statistics for the dependent variables of the trajectory planner.*

|  | Scenario 1 | Scenario 2 | Scenario 3 | Scenario 4 | Scenario 5 | Scenario 6 |
| --- | --- | --- | --- | --- | --- | --- |
| Min. Time to Collision (MTTC) [s] | 0.66 | 0.50 | 1.42 | 1.27 | 4.64 | 4.77 |
| Max. rightward acceleration [m/s2] | 0.33 | 0.29 | 0.55 | 0.39 | 0.44 | 0.28 |
| Max. leftward acceleration [m/s2] | 0.30 | 0.45 | 0.41 | 0.32 | 0.65 | 0.37 |
| Max. deceleration [m/s2] | 3.91 | 0.55 | 3.86 | 0.73 | 0.86 | 0.61 |
| Max. longitudinal acceleration [m/s2] | 1.67 | 0.32 | 2.16 | 0.67 | 0.74 | 0.42 |
| Lane change duration [s] | 2.72 | 2.68 | 2.32 | 2.68 | 2.20 | 2.64 |
| Lane change moment [m] | 1146.93 | 1125.02 | 1115.23 | 1098.00 | 1124.04 | 1111.30 |

Table S2

*Participants’ means and standard deviations per scenario for the minimum time to collision (MTTC).*

| Minimum Time to Collision (MTTC) [s] | | | | | | |
| --- | --- | --- | --- | --- | --- | --- |
|  | Scenario 1 | Scenario 2 | Scenario 3 | Scenario 4 | Scenario 5 | Scenario 6 |
| Means | 1.18 | 1.61 | 2.25 | 2.86 | 10.16 | 12.02 |
| Standard deviation | 0.65 | 0.58 | 0.91 | 0.80 | 4.01 | 2.43 |

Table S3

*Results of repeated-measures ANOVA for the participants’ minimum time to collision (MTTC).*

| Two-way repeated-measures ANOVA | | | | | | | | |
| --- | --- | --- | --- | --- | --- | --- | --- | --- |
| Effect of traffic density | | | Effect of time budget | | | Interaction | | |
| *F(1,24)* | *p* |  | *F(2,48)* | *p* |  | *F(2,48)* | *p* |  |
| 12.4 | 0.002 | 0.34 | 356.3 | <0.001 | 0.94 | 2.3 | 0.112 | 0.09 |

Table S4

*Pairwise comparisons of each scenario concerning the participants’ minimum time to collision*

*(MTTC) using paired t-tests (Bonferroni correction: p < 0.003333 is significantly different).*

| Pairwise comparisons | *t* | *p* | significance |
| --- | --- | --- | --- |
| Scenario 1 vs. Scenario 2  Scenario 1 vs. Scenario 3  Scenario 1 vs. Scenario 4  Scenario 1 vs. Scenario 5  Scenario 1 vs. Scenario 6  Scenario 2 vs. Scenario 3  Scenario 2 vs. Scenario 4  Scenario 2 vs. Scenario 5  Scenario 2 vs. Scenario 6  Scenario 3 vs. Scenario 4  Scenario 3 vs. Scenario 5  Scenario 3 vs. Scenario 6  Scenario 4 vs. Scenario 5  Scenario 4 vs. Scenario 6  Scenario 5 vs. Scenario 6 | t(22) = -3.87  t(24) = -6.21  t(24) = -12.60  t(24) = -11.67  t(24) = -24.37  t(22) = -3.08  t(22) = -8.94  t(22) = -12.09  t(22) = -21.23  t(24) = -3.46  t(24) = -10.74  t(24) = -20.37  t(24) = -10.00  t(24) = -20.11  t(24) = -2.31 | < 0.001  < 0.001  < 0.001  < 0.001  < 0.001  0.005  < 0.001  < 0.001  < 0.001  0.002  < 0.001  < 0.001  < 0.001  < 0.001  0.030 | significant  significant  significant  significant  significant  not significant  significant  significant  significant  significant  significant  significant  significant  significant  not significant |

Table S5

*All participants’ minimum time to collision (MTTC) raw data (25 participants x 6 scenarios).*

| Participant | Scenario 1 | Scenario 2 | Scenario 3 | Scenario 4 | Scenario 5 | Scenario 6 |
| --- | --- | --- | --- | --- | --- | --- |
| 1 | 1.83 | 2.76 | 1.51 | 4.33 | 13.67 | 14.29 |
| 2 | 0.64 | 0.10 | 2.92 | 1.67 | 7.68 | 10.53 |
| 3 | 0.01 | 1.05 | 1.10 | 1.64 | 9.85 | 12.83 |
| 4 | 0.84 | 1.70 | 1.92 | 2.32 | 9.81 | 9.70 |
| 5 | 1.45 | 1.88 | 2.62 | 2.79 | 10.92 | 12.66 |
| 6 | 1.06 | 1.53 | 0.86 | 3.12 | 5.36 | 11.21 |
| 7 | 1.24 | 0.98 | 2.10 | 3.36 | 7.24 | 15.10 |
| 8 | 0.90 | 1.83 | 3.76 | 3.70 | 16.15 | 7.63 |
| 9 | 1.68 | 1.65 | 2.04 | 2.65 | 7.94 | 13.72 |
| 10 | 1.89 | 1.82 | 3.44 | 3.04 | 13.03 | 13.82 |
| 11 | 0.611 | 1.26 | 1.03 | 2.70 | 12.49 | 13.68 |
| 12 | 0.01 | NaN | 2.23 | 2.28 | 2.92 | 11.61 |
| 13 | 0.79 | 1.49 | 3.19 | 3.394 | 14.67 | 14.09 |
| 14 | 1.56 | 1.81 | 2.81 | 2.81 | 14.65 | 13.10 |
| 15 | 2.16 | 1.84 | 3.65 | 4.98 | 15.44 | 11.79 |
| 16 | 0.83 | 1.44 | 2.41 | 3.01 | 14.37 | 14.55 |
| 17 | 1.36 | 1.55 | 2.44 | 2.93 | 4.51 | 8.74 |
| 18 | 0.58 | 1.39 | 1.37 | 2.17 | 6.63 | 7.19 |
| 19 | 2.06 | 2.02 | 3.77 | 3.59 | 16.12 | 15.41 |
| 20 | 2.39 | 2.72 | 1.96 | 2.26 | 9.85 | 13.27 |
| 21 | 0.28 | 1.16 | 0.91 | 1.75 | 11.11 | 8.14 |
| 22 | 1.11 | 0.93 | 1.73 | 2.44 | 3.90 | 11.98 |
| 23 | 0.91 | NaN | 1.84 | 1.97 | 6.15 | 9.36 |
| 24 | 1.53 | 1.91 | 1.40 | 3.32 | 11.52 | 11.40 |
| 25 | 1.79 | 2.20 | 3.19 | 3.27 | 8.03 | 14.76 |

Table S6

*Participants’ means and standard deviations per scenario for the maximum rightward acceleration.*

| Maximum rightward acceleration [m/s2] | | | | | | |
| --- | --- | --- | --- | --- | --- | --- |
|  | Scenario 1 | Scenario 2 | Scenario 3 | Scenario 4 | Scenario 5 | Scenario 6 |
| Means | 4.99 | 4.38 | 3.30 | 2.23 | 1.37 | 1.21 |
| Standard deviation | 3.11 | 3.54 | 2.39 | 1.42 | 0.74 | 0.82 |

Table S7

*Results of repeated-measures ANOVA for the participants’ maximum rightward acceleration.*

| Two-way repeated-measures ANOVA | | | | | | | | |
| --- | --- | --- | --- | --- | --- | --- | --- | --- |
| Effect of traffic density | | | Effect of time budget | | | Interaction | | |
| *F(1,24)* | *p* |  | *F(2,48)* | *p* |  | *F(2,48)* | *p* |  |
| 2.3 | 0.141 | 0.09 | 27.0 | <0.001 | 0.53 | 0.7 | 0.526 | 0.03 |

Table S8

*Pairwise comparisons of each scenario concerning the participants’ maximum rightward*

*acceleration using paired t-tests (Bonferroni correction: p < 0.003333 is significantly different).*

| Pairwise comparisons | *t* | *p* | significance |
| --- | --- | --- | --- |
| Scenario 1 vs. Scenario 2  Scenario 1 vs. Scenario 3  Scenario 1 vs. Scenario 4  Scenario 1 vs. Scenario 5  Scenario 1 vs. Scenario 6  Scenario 2 vs. Scenario 3  Scenario 2 vs. Scenario 4  Scenario 2 vs. Scenario 5  Scenario 2 vs. Scenario 6  Scenario 3 vs. Scenario 4  Scenario 3 vs. Scenario 5  Scenario 3 vs. Scenario 6  Scenario 4 vs. Scenario 5  Scenario 4 vs. Scenario 6  Scenario 5 vs. Scenario 6 | t(22) = 0.34  t(24) = 2.12  t(24) = 4.25  t(24) = 5.91  t(24) = 6.68  t(22) = 1.01  t(22) = 2.55  t(22) = 4.38  t(22) = 4.24  t(24) = 2.16  t(24) = 3.97  t(24) = 4.10  t(24) = 2.88  t(24) = 3.20  t(24) = 1.19 | 0.735  0.045  < 0.001  < 0.001  < 0.001  0.322  0.018  < 0.001  < 0.001  0.041  < 0.001  < 0.001  0.008  0.004  0.247 | not significant  not significant  significant  significant  significant  not significant  not significant  significant  significant  not significant  significant  significant  not significant  not significant  not significant |

Table S9

*All participants’ maximum rightward acceleration raw data (25 participants x 6 scenarios).*

| Participant | Scenario 1 | Scenario 2 | Scenario 3 | Scenario 4 | Scenario 5 | Scenario 6 |
| --- | --- | --- | --- | --- | --- | --- |
| 1 | 10.28 | 2.81 | 2.92 | 2.57 | 3.11 | 3.76 |
| 2 | 4.01 | 9.87 | 1.46 | 1.91 | 0.73 | 0.88 |
| 3 | 5.75 | 5.43 | 3.80 | 2.64 | 1.17 | 1.23 |
| 4 | 2.58 | 1.94 | 0.82 | 1.81 | 1.18 | 1.48 |
| 5 | 1.82 | 3.51 | 6.80 | 1.39 | 1.35 | 1.43 |
| 6 | 5.43 | 1.46 | 5.88 | 1.13 | 0.82 | 1.43 |
| 7 | 1.41 | 1.32 | 2.80 | 3.34 | 2.22 | 0.67 |
| 8 | 4.28 | 4.26 | 0.79 | 1.62 | 1.60 | 1.37 |
| 9 | 4.69 | 2.21 | 1.44 | 0.73 | 0.65 | 0.51 |
| 10 | 3.96 | 9.35 | 1.27 | 0.93 | 1.06 | 0.47 |
| 11 | 5.88 | 1.37 | 7.00 | 1.83 | 0.51 | 1.12 |
| 12 | 10.58 | NaN | 1.22 | 1.64 | 2.54 | 3.70 |
| 13 | 1.16 | 2.61 | 3.53 | 3.96 | 1.66 | 1.62 |
| 14 | 3.53 | 9.73 | 2.86 | 1.02 | 1.75 | 0.81 |
| 15 | 7.55 | 11.10 | 9.58 | 3.97 | 2.89 | 0.65 |
| 16 | 7.52 | 4.07 | 3.14 | 2.44 | 1.37 | 0.65 |
| 17 | 10.88 | 0.99 | 3.21 | 5.84 | 0.87 | 1.16 |
| 18 | 8.25 | 3.17 | 3.78 | 0.82 | 0.98 | 1.08 |
| 19 | 4.81 | 1.22 | 0.98 | 0.64 | 0.71 | 0.57 |
| 20 | 0.49 | 0.66 | 5.77 | 5.51 | 1.11 | 1.02 |
| 21 | 2.20 | 2.84 | 1.63 | 2.24 | 0.44 | 0.51 |
| 22 | 8.51 | 7.68 | 1.29 | 2.97 | 0.90 | 0.82 |
| 23 | 5.90 | NaN | 2.46 | 2.72 | 1.27 | 1.07 |
| 24 | 2.15 | 2.00 | 6.92 | 0.66 | 1.01 | 1.04 |
| 25 | 1.12 | 11.12 | 1.27 | 1.40 | 2.44 | 1.10 |

Table S10

*Participants’ means and standard deviations per scenario for the maximum leftward acceleration.*

| Maximum leftward acceleration [m/s2] | | | | | | |
| --- | --- | --- | --- | --- | --- | --- |
|  | Scenario 1 | Scenario 2 | Scenario 3 | Scenario 4 | Scenario 5 | Scenario 6 |
| Means | 4.43 | 4.37 | 2.80 | 2.25 | 1.05 | 1.05 |
| Standard deviation | 2.53 | 3.06 | 1.83 | 1.22 | 0.50 | 0.55 |

Table S11

*Results of repeated-measures ANOVA for the participants’ maximum leftward acceleration.*

| Two-way repeated-measures ANOVA | | | | | | | | |
| --- | --- | --- | --- | --- | --- | --- | --- | --- |
| Effect of traffic density | | | Effect of time budget | | | Interaction | | |
| *F(1,24)* | *p* |  | *F(2,48)* | *p* |  | *F(2,48)* | *p* |  |
| 0.2 | 0.690 | 0.01 | 40.0 | <0.001 | 0.62 | 0.5 | 0.586 | 0.02 |

Table S12

*Pairwise comparisons of each scenario concerning the participants’ maximum leftward acceleration using paired t-tests (Bonferroni correction: p < 0.003333 is significantly different).*

| Pairwise comparisons | *t* | *p* | significance |
| --- | --- | --- | --- |
| Scenario 1 vs. Scenario 2  Scenario 1 vs. Scenario 3  Scenario 1 vs. Scenario 4  Scenario 1 vs. Scenario 5  Scenario 1 vs. Scenario 6  Scenario 2 vs. Scenario 3  Scenario 2 vs. Scenario 4  Scenario 2 vs. Scenario 5  Scenario 2 vs. Scenario 6  Scenario 3 vs. Scenario 4  Scenario 3 vs. Scenario 5  Scenario 3 vs. Scenario 6  Scenario 4 vs. Scenario 5  Scenario 4 vs. Scenario 6  Scenario 5 vs. Scenario 6 | t(22) = -0.22  t(24) = 2.73  t(24) = 4.03  t(24) = 7.12  t(24) = 7.23  t(22) = 1.92  t(22) = 2.81  t(22) = 5.35  t(22) = 5.05  t(24) = 1.36  t(24) = 4.87  t(24) = 4.66  t(24) = 4.23  t(24) = 4.34  t(24) = -0.01 | 0.830  0.012  < 0.001  < 0.001  < 0.001  0.067  0.010  < 0.001  < 0.001  0.188  < 0.001  < 0.001  < 0.001  < 0.001  0.992 | not significant  not significant  significant  significant  significant  not significant  not significant  significant  significant  not significant  significant  significant  significant  significant  not significant |

Table S13

*All participants’ maximum leftward acceleration raw data (25 participants x 6 scenarios).*

| Participant | Scenario 1 | Scenario 2 | Scenario 3 | Scenario 4 | Scenario 5 | Scenario 6 |
| --- | --- | --- | --- | --- | --- | --- |
| 1 | 10.61 | 2.81 | 3.80 | 2.79 | 1.67 | 2.66 |
| 2 | 4.51 | 9.20 | 0.86 | 3.30 | 0.55 | 0.63 |
| 3 | 4.03 | 3.43 | 3.13 | 1.38 | 0.73 | 0.65 |
| 4 | 3.83 | 2.02 | 0.76 | 1.73 | 1.17 | 1.15 |
| 5 | 2.33 | 3.63 | 4.20 | 1.68 | 0.84 | 0.99 |
| 6 | 4.01 | 1.61 | 5.01 | 1.49 | 0.99 | 1.28 |
| 7 | 1.90 | 2.56 | 1.22 | 1.88 | 0.98 | 1.51 |
| 8 | 4.52 | 3.32 | 2.32 | 1.11 | 1.75 | 1.20 |
| 9 | 3.56 | 2.68 | 1.81 | 1.91 | 0.52 | 0.40 |
| 10 | 2.55 | 10.09 | 1.29 | 1.32 | 0.58 | 0.91 |
| 11 | 5.96 | 1.71 | 3.84 | 2.90 | 0.59 | 0.89 |
| 12 | 9.40 | NaN | 1.42 | 2.19 | 1.99 | 2.11 |
| 13 | 1.46 | 2.78 | 2.82 | 1.98 | 1.06 | 2.11 |
| 14 | 3.07 | 9.33 | 2.66 | 1.48 | 1.17 | 1.62 |
| 15 | 5.12 | 9.39 | 8.75 | 2.42 | 1.91 | 0.74 |
| 16 | 3.89 | 4.52 | 1.16 | 2.36 | 1.81 | 0.46 |
| 17 | 9.04 | 1.78 | 3.98 | 5.46 | 1.07 | 1.13 |
| 18 | 6.67 | 4.70 | 3.02 | 0.68 | 1.22 | 0.83 |
| 19 | 4.13 | 1.82 | 1.63 | 1.33 | 0.59 | 0.74 |
| 20 | 0.46 | 0.54 | 5.44 | 4.96 | 0.57 | 0.74 |
| 21 | 1.74 | 3.99 | 0.84 | 4.78 | 0.28 | 0.34 |
| 22 | 6.97 | 6.26 | 1.93 | 2.31 | 0.58 | 0.86 |
| 23 | 5.08 | NaN | 2.71 | 1.52 | 0.71 | 0.60 |
| 24 | 3.09 | 2.39 | 3.99 | 1.78 | 1.14 | 1.08 |
| 25 | 2.80 | 9.85 | 1.40 | 1.52 | 1.66 | 0.76 |

Table S14

*Participants’ means and standard deviations per scenario for the maximum deceleration.*

| Maximum deceleration [m/s2] | | | | | | |
| --- | --- | --- | --- | --- | --- | --- |
|  | Scenario 1 | Scenario 2 | Scenario 3 | Scenario 4 | Scenario 5 | Scenario 6 |
| Means | 6.48 | 4.23 | 6.92 | 2.78 | 4.95 | 2.55 |
| Standard deviation | 4.02 | 3.63 | 3.71 | 2.84 | 3.02 | 1.73 |

Table S15

*Results of repeated-measures ANOVA for the participants’ maximum deceleration.*

| Two-way repeated-measures ANOVA | | | | | | | | |
| --- | --- | --- | --- | --- | --- | --- | --- | --- |
| Effect of traffic density | | | Effect of time budget | | | Interaction | | |
| *F(1,24)* | *p* |  | *F(2,48)* | *p* |  | *F(2,48)* | *p* |  |
| 23.6 | <0.001 | 0.49 | 5.4 | 0.008 | 0.18 | 1.9 | 0.158 | 0.08 |

Table S16

*Pairwise comparisons of each scenario concerning the participants’ maximum deceleration using paired t-tests (Bonferroni correction: p < 0.003333 is significantly different).*

| Pairwise comparisons | *t* | *p* | significance |
| --- | --- | --- | --- |
| Scenario 1 vs. Scenario 2  Scenario 1 vs. Scenario 3  Scenario 1 vs. Scenario 4  Scenario 1 vs. Scenario 5  Scenario 1 vs. Scenario 6  Scenario 2 vs. Scenario 3  Scenario 2 vs. Scenario 4  Scenario 2 vs. Scenario 5  Scenario 2 vs. Scenario 6  Scenario 3 vs. Scenario 4  Scenario 3 vs. Scenario 5  Scenario 3 vs. Scenario 6  Scenario 4 vs. Scenario 5  Scenario 4 vs. Scenario 6  Scenario 5 vs. Scenario 6 | t(22) = 1.88  t(24) = -0.79  t(24) = 4.18  t(24) = 1.76  t(24) = 4.72  t(22) = -2.60  t(22) = 1.61  t(22) = -1.09  t(22) = 2.33  t(24) = 5.93  t(24) = 2.38  t(24) = 5.84  t(24) = -2.91  t(24) = 0.42  t(24) = 3.39 | 0.074  0.439  < 0.001  0.091  < 0.001  0.016  0.122  0.287  0.029  < 0.001  0.026  < 0.001  0.008  0.682  0.002 | not significant  not significant  significant  not significant  significant  not significant  not significant  not significant  not significant  significant  not significant  significant  not significant  not significant  not significant |

Table S17

*All participants’ maximum deceleration raw data (25 participants x 6 scenarios).*

| Participant | Scenario 1 | Scenario 2 | Scenario 3 | Scenario 4 | Scenario 5 | Scenario 6 |
| --- | --- | --- | --- | --- | --- | --- |
| 1 | 5.50 | 11.93 | 11.36 | 6.84 | 10.00 | 2.31 |
| 2 | 0.42 | 8.28 | 9.34 | 7.54 | 4.55 | 2.45 |
| 3 | 11.41 | 0.45 | 8.09 | 4.06 | 4.31 | 2.83 |
| 4 | 4.82 | 4.03 | 3.73 | 3.38 | 7.53 | 3.79 |
| 5 | 1.25 | 0.24 | 5.02 | 0.31 | 4.17 | 4.22 |
| 6 | 4.50 | 4.22 | 4.35 | 4.33 | 4.45 | 4.01 |
| 7 | 11.74 | 6.29 | 9.89 | 4.62 | 4.81 | 3.86 |
| 8 | 11.41 | 4.44 | 12.07 | 4.13 | 4.57 | 3.10 |
| 9 | 0.42 | 0.38 | 0.29 | 0.27 | 3.66 | 0.26 |
| 10 | 0.34 | 6.32 | 0.29 | 0.26 | 0.24 | 0.24 |
| 11 | 4.24 | 0.28 | 4.68 | 0.36 | 2.78 | 0.24 |
| 12 | 9.67 | NaN | 12.28 | 0.30 | 3.09 | 4.67 |
| 13 | 12.84 | 0.35 | 11.91 | 0.33 | 11.94 | 0.28 |
| 14 | 4.54 | 5.72 | 4.09 | 0.28 | 7.14 | 6.61 |
| 15 | 10.36 | 0.83 | 11.44 | 10.56 | 8.55 | 3.71 |
| 16 | 7.66 | 0.53 | 4.24 | 0.30 | 4.33 | 1.73 |
| 17 | 4.19 | 4.76 | 7.82 | 3.67 | 0.25 | 2.80 |
| 18 | 6.54 | 0.52 | 6.30 | 0.27 | 5.21 | 0.30 |
| 19 | 7.86 | 6.39 | 5.68 | 4.65 | 3.66 | 3.82 |
| 20 | 12.19 | 12.14 | 11.89 | 5.12 | 4.43 | 3.51 |
| 21 | 11.77 | 3.35 | 9.83 | 0.38 | 4.19 | 0.25 |
| 22 | 6.54 | 3.27 | 4.80 | 3.01 | 4.69 | 3.43 |
| 23 | 4.33 | NaN | 6.87 | 0.28 | 0.27 | 2.72 |
| 24 | 4.31 | 4.08 | 4.01 | 3.95 | 3.79 | 2.35 |
| 25 | 3.11 | 8.57 | 2.88 | 0.27 | 11.06 | 0.25 |

Table S18

*Participants’ means and standard deviations per scenario for the maximum longitudinal acceleration.*

| Maximum longitudinal acceleration [m/s2] | | | | | | |
| --- | --- | --- | --- | --- | --- | --- |
|  | Scenario 1 | Scenario 2 | Scenario 3 | Scenario 4 | Scenario 5 | Scenario 6 |
| Means | 2.39 | 1.86 | 3.06 | 1.89 | 2.37 | 1.34 |
| Standard deviation | 1.28 | 1.31 | 1.54 | 1.27 | 1.13 | 0.85 |

Table S19

*Results of repeated-measures ANOVA for the participants’ maximum longitudinal acceleration.*

| Two-way repeated-measures ANOVA | | | | | | | | |
| --- | --- | --- | --- | --- | --- | --- | --- | --- |
| Effect of traffic density | | | Effect of time budget | | | Interaction | | |
| *F(1,24)* | *p* |  | *F(2,48)* | *p* |  | *F(2,48)* | *p* |  |
| 17.8 | <0.001 | 0.42 | 6.5 | 0.003 | 0.21 | 1.9 | 0.169 | 0.07 |

Table S20

*Pairwise comparisons of each scenario concerning the participants’ maximum longitudinal acceleration using paired t-tests (Bonferroni correction: p < 0.003333 is significantly different).*

| Pairwise comparisons | *t* | *p* | significance |
| --- | --- | --- | --- |
| Scenario 1 vs. Scenario 2  Scenario 1 vs. Scenario 3  Scenario 1 vs. Scenario 4  Scenario 1 vs. Scenario 5  Scenario 1 vs. Scenario 6  Scenario 2 vs. Scenario 3  Scenario 2 vs. Scenario 4  Scenario 2 vs. Scenario 5  Scenario 2 vs. Scenario 6  Scenario 3 vs. Scenario 4  Scenario 3 vs. Scenario 5  Scenario 3 vs. Scenario 6  Scenario 4 vs. Scenario 5  Scenario 4 vs. Scenario 6  Scenario 5 vs. Scenario 6 | t(22) = 1.17  t(24) = -2.17  t(24) = 1.45  t(24) = 0.07  t(24) = 3.99  t(22) = -3.69  t(22) = 0.01  t(22) = -1.91  t(22) = 2.18  t(24) = 4.21  t(24) = 2.78  t(24) = 5.36  t(24) = -1.96  t(24) = 2.64  t(24) = 5.05 | 0.253  0.040  0.160  0.945  < 0.001  0.001  0.989  0.070  0.040  < 0.001  0.010  < 0.001  0.061  0.014  < 0.001 | not significant  not significant  not significant  not significant  significant  significant  not significant  not significant  not significant  significant  not significant  significant  not significant  not significant significant |

Table S21

*All participants’ maximum longitudinal acceleration raw data (25 participants x 6 scenarios).*

| Participant | Scenario 1 | Scenario 2 | Scenario 3 | Scenario 4 | Scenario 5 | Scenario 6 |
| --- | --- | --- | --- | --- | --- | --- |
| 1 | 1.30 | 3.02 | 5.14 | 2.11 | 3.43 | 1.10 |
| 2 | 0.97 | 4.17 | 4.82 | 3.52 | 4.13 | 0.41 |
| 3 | 2.61 | 0.82 | 3.47 | 1.60 | 2.93 | 1.17 |
| 4 | 2.92 | 1.14 | 1.26 | 1.65 | 2.18 | 2.77 |
| 5 | 2.16 | 1.85 | 2.08 | 1.55 | 3.32 | 2.41 |
| 6 | 2.21 | 1.94 | 2.94 | 2.88 | 2.94 | 1.30 |
| 7 | 4.19 | 2.42 | 5.60 | 2.35 | 5.07 | 2.15 |
| 8 | 3.86 | 0.99 | 4.95 | 1.43 | 3.30 | 1.08 |
| 9 | 0.01 | 2.09 | 0.83 | 0.83 | 1.88 | 0.71 |
| 10 | 1.21 | 1.40 | 1.38 | 1.23 | 0.23 | 0.33 |
| 11 | 1.38 | 0.76 | 1.80 | 0.70 | 1.11 | 1.14 |
| 12 | 4.38 | NaN | 4.06 | 3.98 | 3.22 | 3.23 |
| 13 | 6.17 | 1.61 | 4.79 | 1.63 | 2.69 | 0.71 |
| 14 | 1.54 | 3.83 | 1.95 | 1.44 | 2.51 | 2.10 |
| 15 | 2.11 | 1.04 | 3.06 | 3.69 | 2.62 | 2.01 |
| 16 | 2.76 | 0.60 | 1.29 | 0.91 | 1.51 | 0.86 |
| 17 | 2.80 | 1.30 | 3.51 | 0.77 | 0.63 | 0.76 |
| 18 | 2.56 | 0.57 | 3.50 | 0.76 | 2.37 | 1.57 |
| 19 | 2.49 | 1.16 | 1.08 | 1.23 | 0.83 | 0.43 |
| 20 | 2.65 | 4.96 | 4.87 | 4.70 | 1.97 | 1.94 |
| 21 | 1.78 | 1.04 | 1.31 | 0.73 | 2.02 | 0.76 |
| 22 | 2.92 | 1.59 | 1.97 | 1.08 | 2.07 | 1.15 |
| 23 | 1.47 | NaN | 4.26 | 0.60 | 0.97 | 0.49 |
| 24 | 1.49 | 1.07 | 1.84 | 1.39 | 1.93 | 1.29 |
| 25 | 1.73 | 4.75 | 4.68 | 4.64 | 3.28 | 2.58 |

Table S22

*Participants’ means and standard deviations per scenario for the lane change duration.*

| Lane change duration [s] | | | | | | |
| --- | --- | --- | --- | --- | --- | --- |
|  | Scenario 1 | Scenario 2 | Scenario 3 | Scenario 4 | Scenario 5 | Scenario 6 |
| Means | 1.64 | 1.47 | 1.92 | 1.74 | 2.72 | 2.93 |
| Standard deviation | 0.89 | 0.64 | 0.85 | 0.38 | 1.01 | 1-44 |

Table S23

*Results of repeated-measures ANOVA for the participants’ lane change duration.*

| Two-way repeated-measures ANOVA | | | | | | | | |
| --- | --- | --- | --- | --- | --- | --- | --- | --- |
| Effect of traffic density | | | Effect of time budget | | | Interaction | | |
| *F(1,24)* | *p* |  | *F(2,48)* | *p* |  | *F(2,48)* | *p* |  |
| 0.3 | 0.595 | 0.01 | 28.9 | <0.001 | 0.55 | 0.9 | 0.432 | 0.04 |

Table S24

*Pairwise comparisons of each scenario concerning the participants’ lane change duration using paired t-tests (Bonferroni correction: p < 0.003333 is significantly different).*

| Pairwise comparisons | *t* | *p* | significance |
| --- | --- | --- | --- |
| Scenario 1 vs. Scenario 2  Scenario 1 vs. Scenario 3  Scenario 1 vs. Scenario 4  Scenario 1 vs. Scenario 5  Scenario 1 vs. Scenario 6  Scenario 2 vs. Scenario 3  Scenario 2 vs. Scenario 4  Scenario 2 vs. Scenario 5  Scenario 2 vs. Scenario 6  Scenario 3 vs. Scenario 4  Scenario 3 vs. Scenario 5  Scenario 3 vs. Scenario 6  Scenario 4 vs. Scenario 5  Scenario 4 vs. Scenario 6  Scenario 5 vs. Scenario 6 | t(22) = 1.26  t(24) = -1.19  t(24) = -0.50  t(24) = -5.12  t(24) = -4.12  t(22) = -1.91  t(22) = -1.81  t(22) = -5.62  t(22) = -4.36  t(24) = 0.82  t(24) = -3.00  t(24) = -3.96  t(24) = -4.21  t(24) = -4.15  t(24) = -0.63 | 0.222  0.247  0.622  < 0.001  < 0.001  0.069  0.085  < 0.001  < 0.001  0.420  0.006  < 0.001  < 0.001  < 0.001  0.536 | not significant  not significant  not significant  significant  significant  not significant  not significant  significant  significant  significant  not significant  significant  significant  significant  not significant |

Table S25

*All participants’ lane change duration raw data (25 participants x 6 scenarios).*

| Participant | Scenario 1 | Scenario 2 | Scenario 3 | Scenario 4 | Scenario 5 | Scenario 6 |
| --- | --- | --- | --- | --- | --- | --- |
| 1 | 0.59 | 3.2 | 1.86 | 1.81 | 2.15 | 1.55 |
| 2 | 1.12 | 0.5 | 4.43 | 1.79 | 2.26 | 5.05 |
| 3 | 2.28 | 1.00 | 0.97 | 1.43 | 2.05 | 2.06 |
| 4 | 1.28 | 1.38 | 2.4 | 1.33 | 2.01 | 1.31 |
| 5 | 1.45 | 0.95 | 0.84 | 1.74 | 5.38 | 2.00 |
| 6 | 1.27 | 1.69 | 1.17 | 1.9 | 2.04 | 2.75 |
| 7 | 2.94 | 1.65 | 1.38 | 1.88 | 2.67 | 3.57 |
| 8 | 2.69 | 1.85 | 2.38 | 2.02 | 2.89 | 4.71 |
| 9 | 0.94 | 1.28 | 1.97 | 1.92 | 3.62 | 3.12 |
| 10 | 1.42 | 0.99 | 1.96 | 2.06 | 2.09 | 2.94 |
| 11 | 1.93 | 1.54 | 1.97 | 1.33 | 4.22 | 2.93 |
| 12 | 0.57 | NaN | 2.22 | 1.49 | 1.10 | 1.09 |
| 13 | 2.96 | 1.92 | 2.19 | 1.18 | 4.04 | 1.73 |
| 14 | 2.20 | 0.85 | 2.57 | 1.67 | 1.94 | 2.63 |
| 15 | 0.68 | 0.61 | 1.06 | 2.33 | 1.14 | 3.33 |
| 16 | 1.32 | 1.39 | 2.91 | 1.39 | 2.26 | 3.07 |
| 17 | 0.54 | 1.94 | 1.51 | 1.76 | 1.92 | 1.71 |
| 18 | 0.81 | 1.24 | 1.72 | 2.01 | 2.96 | 4.53 |
| 19 | 3.18 | 1.95 | 1.56 | 2.16 | 2.86 | 2.52 |
| 20 | 3.24 | 2.56 | 2.07 | 1.14 | 3.52 | 1.85 |
| 21 | 2.43 | 1.12 | 3.63 | 1.17 | 3.43 | 7.64 |
| 22 | 0.77 | 1.46 | 1.42 | 2.16 | 2.84 | 3.81 |
| 23 | 0.75 | NaN | 1.07 | 1.67 | 1.93 | 1.89 |
| 24 | 2.11 | 2.06 | 0.87 | 2.64 | 2.67 | 3.43 |
| 25 | 1.50 | 0.70 | 1.84 | 1.60 | 4.07 | 2.06 |

Table S26

*Participants’ means and standard deviations per scenario for the* *subjective criticality.*

| Subjective criticality [Likert-Scale 0-6] | | | | | | |
| --- | --- | --- | --- | --- | --- | --- |
|  | Scenario 1 | Scenario 2 | Scenario 3 | Scenario 4 | Scenario 5 | Scenario 6 |
| Means | 5.00 | 3.96 | 3.92 | 2.44 | 1.60 | 1.04 |
| Standard deviation | 1.44 | 1.46 | 1.15 | 1.39 | 1.61 | 1.49 |

Table S27

*Results of repeated-measures ANOVA for the participants’ subjective criticality.*

| Two-way repeated-measures ANOVA | | | | | | | | |
| --- | --- | --- | --- | --- | --- | --- | --- | --- |
| Effect of traffic density | | | Effect of time budget | | | Interaction | | |
| *F(1,24)* | *p* |  | *F(2,48)* | *p* |  | *F(2,48)* | *p* |  |
| 27.6 | <0.001 | 0.53 | 91.3 | <0.001 | 0.79 | 1.8 | 0.182 | 0.07 |

Table S28

*Pairwise comparisons of each scenario concerning the participants’ subjective criticality using paired t-tests (Bonferroni correction: p < 0.003333 is significantly different).*

| Pairwise comparisons | *t* | *p* | significance |
| --- | --- | --- | --- |
| Scenario 1 vs. Scenario 2  Scenario 1 vs. Scenario 3  Scenario 1 vs. Scenario 4  Scenario 1 vs. Scenario 5  Scenario 1 vs. Scenario 6  Scenario 2 vs. Scenario 3  Scenario 2 vs. Scenario 4  Scenario 2 vs. Scenario 5  Scenario 2 vs. Scenario 6  Scenario 3 vs. Scenario 4  Scenario 3 vs. Scenario 5  Scenario 3 vs. Scenario 6  Scenario 4 vs. Scenario 5  Scenario 4 vs. Scenario 6  Scenario 5 vs. Scenario 6 | t(22) = 2.50  t(24) = 3.42  t(24) = 6.46  t(24) = 8.88  t(24) = 12.22  t(22) = 0.22  t(22) = 5.49  t(22) = 8.39  t(22) = 7.91  t(24) = 4.83  t(24) = 7.13  t(24) = 9.91  t(24) = 2.77  t(24) = 4.36  t(24) = 1.86 | 0.020  0.002  < 0.001  < 0.001  < 0.001  0.824  < 0.001  < 0.001  < 0.001  < 0.001  < 0.001  < 0.001  0.011  < 0.001  0.075 | not significant  significant  significant  significant  significant  not significant  significant  significant  significant  significant  significant  significant  not significant  significant  not significant |

Table S29

*All participants’ subjective criticality raw data (25 participants x 6 scenarios).*

| Participant | Scenario 1 | Scenario 2 | Scenario 3 | Scenario 4 | Scenario 5 | Scenario 6 |
| --- | --- | --- | --- | --- | --- | --- |
| 1 | 6 | 4 | 5 | 2 | 2 | 2 |
| 2 | 6 | 6 | 3 | 4 | 0 | 0 |
| 3 | 6 | 5 | 4 | 2 | 1 | 1 |
| 4 | 4 | 3 | 2 | 3 | 1 | 0 |
| 5 | 6 | 0 | 4 | 0 | 0 | 0 |
| 6 | 6 | 5 | 6 | 5 | 3 | 3 |
| 7 | 5 | 2 | 3 | 3 | 2 | 1 |
| 8 | 6 | 4 | 4 | 2 | 2 | 0 |
| 9 | 5 | 4 | 5 | 2 | 4 | 0 |
| 10 | 5 | 6 | 3 | 3 | 4 | 0 |
| 11 | 5 | 2 | 5 | 3 | 0 | 0 |
| 12 | 6 | NaN | 5 | 5 | 6 | 5 |
| 13 | 6 | 5 | 4 | 3 | 4 | 4 |
| 14 | 6 | 3 | 3 | 2 | 0 | 1 |
| 15 | 4 | 5 | 4 | 3 | 1 | 1 |
| 16 | 6 | 6 | 6 | 5 | 3 | 1 |
| 17 | 4 | 3 | 4 | 1 | 0 | 0 |
| 18 | 6 | 3 | 5 | 1 | 1 | 4 |
| 19 | 6 | 4 | 3 | 2 | 1 | 2 |
| 20 | 3 | 3 | 4 | 3 | 0 | 1 |
| 21 | 5 | 4 | 5 | 0 | 1 | 0 |
| 22 | 0 | 5 | 3 | 3 | 1 | 0 |
| 23 | 3 | NaN | 4 | 2 | 1 | 0 |
| 24 | 6 | 4 | 2 | 1 | 0 | 0 |
| 25 | 4 | 5 | 2 | 1 | 2 | 0 |

Table S30

*Participants’ means and standard deviations per scenario for the* *subjective discomfort.*

| Subjective discomfort [Likert-Scale 0-6] | | | | | | |
| --- | --- | --- | --- | --- | --- | --- |
|  | Scenario 1 | Scenario 2 | Scenario 3 | Scenario 4 | Scenario 5 | Scenario 6 |
| Means | 4.36 | 2.74 | .24 | 1.88 | 1.56 | 0.68 |
| Standard deviation | 1.47 | 1.54 | 1.33 | 0.93 | 1.34 | 0.90 |

Table S31

*Results of repeated-measures ANOVA for the participants’ subjective discomfort.*

| Two-way repeated-measures ANOVA | | | | | | | | |
| --- | --- | --- | --- | --- | --- | --- | --- | --- |
| Effect of traffic density | | | Effect of time budget | | | Interaction | | |
| *F(1,24)* | *p* |  | *F(2,48)* | *p* |  | *F(2,48)* | *p* |  |
| 53.2 | <0.001 | 0.69 | 45.0 | <0.001 | 0.65 | 2.0 | 0.142 | 0.08 |

Table S32

*Pairwise comparisons of each scenario concerning the participants’ subjective discomfort using paired t-tests (Bonferroni correction: p < 0.003333 is significantly different).*

| Pairwise comparisons | *t* | *p* | significance |
| --- | --- | --- | --- |
| Scenario 1 vs. Scenario 2  Scenario 1 vs. Scenario 3  Scenario 1 vs. Scenario 4  Scenario 1 vs. Scenario 5  Scenario 1 vs. Scenario 6  Scenario 2 vs. Scenario 3  Scenario 2 vs. Scenario 4  Scenario 2 vs. Scenario 5  Scenario 2 vs. Scenario 6  Scenario 3 vs. Scenario 4  Scenario 3 vs. Scenario 5  Scenario 3 vs. Scenario 6  Scenario 4 vs. Scenario 5  Scenario 4 vs. Scenario 6  Scenario 5 vs. Scenario 6 | t(22) = 5.74  t(24) = 4.20  t(24) = 8.57  t(24) = 7.40  t(24) = 12.57  t(22) = -1.16  t(22) = 2.87  t(22) = 3.59  t(22) = 5.96  t(24) = 5.04  t(24) = 4.68  t(24) = 9.04  t(24) = 0.94  t(24) = 5.55  t(24) = 2.97 | < 0.001  < 0.001  < 0.001  < 0.001  < 0.001  0.260  0.009  0.002  < 0.001  < 0.001  < 0.001  < 0.001  0.356  < 0.001  0.007 | significant  significant  significant  significant  significant  not significant  not significant  significant  significant  significant  significant  significant  not significant  significant  not significant |

Table S33

*All participants’ subjective discomfort raw data (25 participants x 6 scenarios).*

| Participant | Scenario 1 | Scenario 2 | Scenario 3 | Scenario 4 | Scenario 5 | Scenario 6 |
| --- | --- | --- | --- | --- | --- | --- |
| 1 | 6 | 4 | 4 | 2 | 2 | 2 |
| 2 | 6 | 6 | 3 | 4 | 0 | 0 |
| 3 | 6 | 4 | 5 | 3 | 1 | 2 |
| 4 | 4 | 2 | 3 | 2 | 2 | 0 |
| 5 | 4 | 0 | 3 | 0 | 0 | 0 |
| 6 | 5 | 3 | 5 | 3 | 2 | 1 |
| 7 | 6 | 1 | 3 | 2 | 2 | 1 |
| 8 | 4 | 4 | 3 | 1 | 2 | 0 |
| 9 | 3 | 2 | 0 | 1 | 1 | 0 |
| 10 | 3 | 2 | 2 | 2 | 4 | 0 |
| 11 | 4 | 1 | 4 | 2 | 0 | 0 |
| 12 | 6 | NaN | 4 | 3 | 4 | 3 |
| 13 | 4 | 3 | 4 | 2 | 4 | 1 |
| 14 | 5 | 3 | 3 | 2 | 0 | 1 |
| 15 | 1 | 1 | 1 | 1 | 1 | 1 |
| 16 | 6 | 5 | 5 | 2 | 3 | 0 |
| 17 | 5 | 3 | 4 | 1 | 0 | 0 |
| 18 | 4 | 2 | 4 | 2 | 2 | 2 |
| 19 | 5 | 3 | 2 | 1 | 1 | 2 |
| 20 | 3 | 2 | 4 | 3 | 0 | 1 |
| 21 | 6 | 4 | 5 | 1 | 2 | 0 |
| 22 | 5 | 4 | 2 | 3 | 0 | 0 |
| 23 | 4 | NaN | 4 | 1 | 3 | 0 |
| 24 | 1 | 0 | 3 | 2 | 0 | 0 |
| 25 | 3 | 4 | 1 | 1 | 3 | 0 |

Table S34

*Participants’ means and standard deviations per scenario for the* *subjective complexity.*

| Subjective complexity [Likert-Scale 0-6] | | | | | | |
| --- | --- | --- | --- | --- | --- | --- |
|  | Scenario 1 | Scenario 2 | Scenario 3 | Scenario 4 | Scenario 5 | Scenario 6 |
| Means | 4.24 | 3.39 | 3.16 | 2.04 | 1.24 | 0.68 |
| Standard deviation | 1.51 | 1.41 | 1.21 | 1.02 | 1.27 | .90 |

Table S35

*Results of repeated-measures ANOVA for the participants’ subjective complexity.*

| Two-way repeated-measures ANOVA | | | | | | | | |
| --- | --- | --- | --- | --- | --- | --- | --- | --- |
| Effect of traffic density | | | Effect of time budget | | | Interaction | | |
| *F(1,24)* | *p* |  | *F(2,48)* | *p* |  | *F(2,48)* | *p* |  |
| 22.5 | <0.001 | 0.48 | 79.1 | <0.001 | 0.77 | 0.9 | 0.415 | 0.04 |

Table S36

*Pairwise comparisons of each scenario concerning the participants’ subjective complexity using paired t-tests (Bonferroni correction: p < 0.003333 is significantly different).*

| Pairwise comparisons | *t* | *p* | significance |
| --- | --- | --- | --- |
| Scenario 1 vs. Scenario 2  Scenario 1 vs. Scenario 3  Scenario 1 vs. Scenario 4  Scenario 1 vs. Scenario 5  Scenario 1 vs. Scenario 6  Scenario 2 vs. Scenario 3  Scenario 2 vs. Scenario 4  Scenario 2 vs. Scenario 5  Scenario 2 vs. Scenario 6  Scenario 3 vs. Scenario 4  Scenario 3 vs. Scenario 5  Scenario 3 vs. Scenario 6  Scenario 4 vs. Scenario 5  Scenario 4 vs. Scenario 6  Scenario 5 vs. Scenario 6 | t(22) = 2.51  t(24) = 3.67  t(24) = 7.08  t(24) = 8.91  t(24) = 13.43  t(22) = 0.77  t(22) = 4.61  t(22) = 5.56  t(22) = 8.85  t(24) = 3.41  t(24) = 5.20  t(24) = 8.25  t(24) = 2.89  t(24) = 5.73  t(24) = 2.42 | 0.020  0.001  < 0.001  < 0.001  < 0.001  0.451  < 0.001  < 0.001  < 0.001  0.002  < 0.001  < 0.001  0.008  < 0.001  0.024 | not significant  significant  significant  significant  significant  not significant  significant  significant  significant  significant  significant  significant  not significant  significant  not significant |

Table S37

*All participants’ subjective complexity raw data (25 participants x 6 scenarios).*

| Participant | Scenario 1 | Scenario 2 | Scenario 3 | Scenario 4 | Scenario 5 | Scenario 6 |
| --- | --- | --- | --- | --- | --- | --- |
| 1 | 6 | 4 | 3 | 2 | 2 | 2 |
| 2 | 6 | 6 | 2 | 4 | 0 | 0 |
| 3 | 4 | 5 | 4 | 2 | 1 | 1 |
| 4 | 5 | 2 | 2 | 2 | 3 | 0 |
| 5 | 3 | 0 | 4 | 0 | 0 | 0 |
| 6 | 3 | 2 | 3 | 2 | 1 | 0 |
| 7 | 6 | 2 | 3 | 3 | 4 | 2 |
| 8 | 6 | 4 | 5 | 1 | 2 | 0 |
| 9 | 3 | 2 | 2 | 1 | 0 | 0 |
| 10 | 2 | 3 | 1 | 1 | 1 | 0 |
| 11 | 4 | 2 | 3 | 3 | 0 | 0 |
| 12 | 6 | NaN | 4 | 3 | 3 | 2 |
| 13 | 6 | 4 | 2 | 3 | 3 | 3 |
| 14 | 5 | 3 | 3 | 2 | 0 | 1 |
| 15 | 4 | 5 | 5 | 3 | 1 | 1 |
| 16 | 5 | 6 | 5 | 2 | 1 | 1 |
| 17 | 4 | 3 | 4 | 2 | 0 | 0 |
| 18 | 6 | 4 | 5 | 1 | 1 | 1 |
| 19 | 4 | 3 | 2 | 1 | 1 | 2 |
| 20 | 2 | 4 | 2 | 3 | 1 | 1 |
| 21 | 3 | 3 | 3 | 4 | 3 | 0 |
| 22 | 3 | 3 | 2 | 2 | 0 | 0 |
| 23 | 2 | NaN | 3 | 1 | 0 | 0 |
| 24 | 6 | 4 | 5 | 2 | 0 | 0 |
| 25 | 2 | 4 | 2 | 1 | 3 | 0 |

Table S38

*Participants’ means and standard deviations per scenario for the* *subjective time budget.*

| Subjective time budget [Likert-Scale 0-6] | | | | | | |
| --- | --- | --- | --- | --- | --- | --- |
|  | Scenario 1 | Scenario 2 | Scenario 3 | Scenario 4 | Scenario 5 | Scenario 6 |
| Means | 5.04 | 4.13 | 3.52 | 2.6 | 1.2 | 0.72 |
| Standard deviation | 1.06 | 1.36 | 1.33 | 1.12 | 1.29 | 1.06 |

Table S39

*Results of repeated-measures ANOVA for the participants’ subjective time budget.*

| Two-way repeated-measures ANOVA | | | | | | | | |
| --- | --- | --- | --- | --- | --- | --- | --- | --- |
| Effect of traffic density | | | Effect of time budget | | | Interaction | | |
| *F(1,24)* | *p* |  | *F(2,48)* | *p* |  | *F(2,48)* | *p* |  |
| 20.3 | <0.001 | 0.46 | 120.0 | <0.001 | 0.83 | 0.8 | 0.456 | 0.03 |

Table S40

*Pairwise comparisons of each scenario concerning the participants’ subjective time budget using paired t-tests (Bonferroni correction: p < 0.003333 is significantly different).*

| Pairwise comparisons | *t* | *p* | significance |
| --- | --- | --- | --- |
| Scenario 1 vs. Scenario 2  Scenario 1 vs. Scenario 3  Scenario 1 vs. Scenario 4  Scenario 1 vs. Scenario 5  Scenario 1 vs. Scenario 6  Scenario 2 vs. Scenario 3  Scenario 2 vs. Scenario 4  Scenario 2 vs. Scenario 5  Scenario 2 vs. Scenario 6  Scenario 3 vs. Scenario 4  Scenario 3 vs. Scenario 5  Scenario 3 vs. Scenario 6  Scenario 4 vs. Scenario 5  Scenario 4 vs. Scenario 6  Scenario 5 vs. Scenario 6 | t(22) = 3.25  t(24) = 4.80  t(24) = 9.43  t(24) = 11.46  t(24) = 17.78  t(22) = 1.64  t(22) = 5.74  t(22) = 7.58  t(22) = 10.88  t(24) = 3.19  t(24) = 6.82  t(24) = 10.11  t(24) = 4.76  t(24) = 8.60  t(24) = 1.81 | 0.004  < 0.001  < 0.001  < 0.001  < 0.001  0.115  < 0.001  < 0.001  < 0.001  0.004  < 0.001  < 0.001  < 0.001  < 0.001  0.083 | not significant  significant  significant  significant  significant  not significant  significant  significant  significant  not significant  significant  significant  significant  significant  not significant |

Table S41

*All participants’ subjective time budget raw data (25 participants x 6 scenarios).*

| Participant | Scenario 1 | Scenario 2 | Scenario 3 | Scenario 4 | Scenario 5 | Scenario 6 |
| --- | --- | --- | --- | --- | --- | --- |
| 1 | 6 | 3 | 5 | 4 | 3 | 2 |
| 2 | 6 | 6 | 2 | 4 | 0 | 0 |
| 3 | 6 | 5 | 3 | 2 | 0 | 1 |
| 4 | 5 | 4 | 2 | 1 | 0 | 0 |
| 5 | 3 | 0 | 2 | 0 | 0 | 0 |
| 6 | 5 | 5 | 4 | 3 | 1 | 0 |
| 7 | 5 | 2 | 3 | 3 | 3 | 0 |
| 8 | 6 | 4 | 4 | 1 | 3 | 0 |
| 9 | 6 | 5 | 1 | 3 | 0 | 0 |
| 10 | 3 | 4 | 1 | 2 | 3 | 0 |
| 11 | 4 | 3 | 5 | 4 | 0 | 1 |
| 12 | 6 | NaN | 3 | 4 | 2 | 3 |
| 13 | 6 | 5 | 5 | 4 | 4 | 4 |
| 14 | 6 | 3 | 3 | 3 | 0 | 0 |
| 15 | 4 | 5 | 5 | 3 | 1 | 1 |
| 16 | 6 | 6 | 5 | 4 | 1 | 1 |
| 17 | 5 | 3 | 4 | 1 | 0 | 0 |
| 18 | 6 | 5 | 5 | 2 | 0 | 1 |
| 19 | 6 | 4 | 3 | 2 | 1 | 2 |
| 20 | 3 | 4 | 3 | 3 | 1 | 1 |
| 21 | 4 | 5 | 5 | 3 | 3 | 0 |
| 22 | 5 | 5 | 4 | 3 | 1 | 1 |
| 23 | 4 | NaN | 4 | 2 | 1 | 0 |
| 24 | 5 | 4 | 5 | 2 | 0 | 0 |
| 25 | 5 | 5 | 2 | 2 | 2 | 0 |

Table S42

*Participants’ means and standard deviations per scenario for the eyes-on-road-time.*

| Eyes on road time [s] | | | | | | |
| --- | --- | --- | --- | --- | --- | --- |
|  | Scenario 1 | Scenario 2 | Scenario 3 | Scenario 4 | Scenario 5 | Scenario 6 |
| Means | 0.84 | 0.94 | 0.90 | 0.94 | 0.82 | 0.86 |
| Standard deviation | 0.37 | 0.36 | 0.35 | 0.37 | 0.28 | 0.23 |

Table S43

*Results of repeated-measures ANOVA for the participants’ eyes-on-road-time.*

| Two-way repeated-measures ANOVA | | | | | | | | |
| --- | --- | --- | --- | --- | --- | --- | --- | --- |
| Effect of traffic density | | | Effect of time budget | | | Interaction | | |
| *F(1,24)* | *p* |  | *F(2,48)* | *p* |  | *F(2,48)* | *p* |  |
| 1.6 | 0.220 | 0.06 | 1.1 | 0.354 | 0.04 | 0.2 | 0.808 | 0.01 |

Table S44

*Pairwise comparisons of each scenario concerning the participants’ eyes-on-road-time using paired t-tests (Bonferroni correction: p < 0.003333 is significantly different).*

| Pairwise comparisons | *t* | *p* | significance |
| --- | --- | --- | --- |
| Scenario 1 vs. Scenario 2  Scenario 1 vs. Scenario 3  Scenario 1 vs. Scenario 4  Scenario 1 vs. Scenario 5  Scenario 1 vs. Scenario 6  Scenario 2 vs. Scenario 3  Scenario 2 vs. Scenario 4  Scenario 2 vs. Scenario 5  Scenario 2 vs. Scenario 6  Scenario 3 vs. Scenario 4  Scenario 3 vs. Scenario 5  Scenario 3 vs. Scenario 6  Scenario 4 vs. Scenario 5  Scenario 4 vs. Scenario 6  Scenario 5 vs. Scenario 6 | t(24) = -1.08  t(24) = -0.61  t(24) = -1.17  t(24) = 0.53  t(24) = -0.16  t(24) = 0.46  t(24) = -0.05  t(24) = 1.30  t(24) = 1.07  t(24) = -0.59  t(24) = 1.01  t(24) = 0.61  t(24) = 1.81  t(24) = 1.41  t(24) = -0.79 | 0.289  0.549  0.254  0.601  0.874  0.646  0.962  0.207  0.296  0.560  0.320  0.549  0.082  0.172  0.435 | not significant  not significant  not significant  not significant  not significant  not significant  not significant  not significant  not significant  not significant  not significant  not significant  not significant  not significant  not significant |

Table S45

*All participants’ eyes-on-road-time raw data (25 participants x 6 scenarios).*

| Participant | Scenario 1 | Scenario 2 | Scenario 3 | Scenario 4 | Scenario 5 | Scenario 6 |
| --- | --- | --- | --- | --- | --- | --- |
| 1 | 1.3 | 1.2 | 1.0 | 0.9 | 1.0 | 0.9 |
| 2 | 0 | 0 | 0.4 | 0 | 0.6 | 0.7 |
| 3 | 0.8 | 1.5 | 0.8 | 1.1 | 0.7 | 0.7 |
| 4 | 0.8 | 0.8 | 0.8 | 1.2 | 0.9 | 0.9 |
| 5 | 0.7 | 0.7 | 0.7 | 0.8 | 0.7 | 0.8 |
| 6 | 1.3 | 0.9 | 1.3 | 1.8 | 1.4 | 1.3 |
| 7 | 1.1 | 1.1 | 1.0 | 1.0 | 1.5 | 1.2 |
| 8 | 1.0 | 0.9 | 0.8 | 0.9 | 1.0 | 1.2 |
| 9 | 1.5 | 1.2 | 0.4 | 0.7 | 1.1 | 1.0 |
| 10 | 0.6 | 1.4 | 0.6 | 1.0 | 0.6 | 0.7 |
| 11 | 1.0 | 1.0 | 1.9 | 1.2 | 0.8 | 0.9 |
| 12 | 0.6 | 0.6 | 1.0 | 0.8 | 0.9 | 0.8 |
| 13 | 1.2 | 0.9 | 1.0 | 0.8 | 0.9 | 1.1 |
| 14 | 0.9 | 1.4 | 1.0 | 1.6 | 0.9 | 0.9 |
| 15 | 0.8 | 1.0 | 1.6 | 1.1 | 0.8 | 0.8 |
| 16 | 0.8 | 0.6 | 0.8 | 1.4 | 1.0 | 0.9 |
| 17 | 0 | 1.2 | 0.9 | 1.3 | 0.3 | 1.3 |
| 18 | 1.0 | 0.7 | 0.8 | 0.9 | 0.8 | 0.9 |
| 19 | 1.3 | 1.0 | 0.7 | 0.9 | 0.8 | 0.7 |
| 20 | 0.8 | 0.9 | 1.2 | 0.8 | 0.6 | 07 |
| 21 | 1.2 | 0.6 | 0.6 | 1.0 | 1.0 | 0.7 |
| 22 | 0.7 | 1.0 | 1.0 | 0.7 | 0.7 | 0.6 |
| 23 | 0.7 | 1.7 | 1.0 | 0.5 | 0.3 | 0.7 |
| 24 | 0.5 | 0.5 | 0.4 | 0.5 | 0.5 | 0.5 |
| 25 | 0.5 | 0.7 | 0.8 | 0.7 | 0.6 | 0.5 |

Table S46

*Participants’ means and standard deviations per scenario for the eyes-in-side-mirror time.*

| Eyes-in-side-mirror time [s] | | | | | | |
| --- | --- | --- | --- | --- | --- | --- |
|  | Scenario 1 | Scenario 2 | Scenario 3 | Scenario 4 | Scenario 5 | Scenario 6 |
| Means | 2.27 | 2.17 | 2.57 | 2.13 | 2.85 | 3.35 |
| Standard deviation | 1.37 | 0.80 | 1.29 | 1.10 | 1.95 | 2.12 |

Table S47

*Results of repeated-measures ANOVA for the participants’ eye- in-side-mirror time.*

| Two-way repeated-measures ANOVA | | | | | | | | |
| --- | --- | --- | --- | --- | --- | --- | --- | --- |
| Effect of traffic density | | | Effect of time budget | | | Interaction | | |
| *F(1,24)* | *p* |  | *F(2,48)* | *p* |  | *F(2,48)* | *p* |  |
| 0.0 | 0.951 | 0.00 | 5.7 | 0.006 | 0.19 | 1.3 | 0.286 | 0.05 |

Table S48

*Pairwise comparisons of each scenario concerning the participants’ eyes-in-side-mirror time using paired t-tests (Bonferroni correction: p < 0.003333 is significantly different).*

| Pairwise comparisons | *t* | *p* | significance |
| --- | --- | --- | --- |
| Scenario 1 vs. Scenario 2  Scenario 1 vs. Scenario 3  Scenario 1 vs. Scenario 4  Scenario 1 vs. Scenario 5  Scenario 1 vs. Scenario 6  Scenario 2 vs. Scenario 3  Scenario 2 vs. Scenario 4  Scenario 2 vs. Scenario 5  Scenario 2 vs. Scenario 6  Scenario 3 vs. Scenario 4  Scenario 3 vs. Scenario 5  Scenario 3 vs. Scenario 6  Scenario 4 vs. Scenario 5  Scenario 4 vs. Scenario 6  Scenario 5 vs. Scenario 6 | t(24) = 0.50  t(24) = -1.22  t(24) = 0.43  t(24) = -1.32  t(24) = -2.22  t(24) = -1.64  t(24) = 0.12  t(24) = -1.61  t(24) = -2.43  t(24) = 1.52  t(24) = -0.62  t(24) = -1.64  t(24) = -2.06  t(24) = -2.48  t(24) = -0.83 | 0.620  0.234  0.670  0.201  0.036  0.114  0.902  0.120  0.023  0.141  0.538  0.115  0.050  0.021  0.414 | not significant  not significant  not significant  not significant  not significant  not significant  not significant  not significant  not significant  not significant  not significant  not significant  not significant  not significant  not significant |

Table S49

*All participants’ eyes-in-side-mirror time raw data (25 participants x 6 scenarios).*

| Participant | Scenario 1 | Scenario 2 | Scenario 3 | Scenario 4 | Scenario 5 | Scenario 6 |
| --- | --- | --- | --- | --- | --- | --- |
| 1 | 2.7 | 2.4 | 2.0 | 2.2 | 2.8 | 2.7 |
| 2 | 0 | 0 | 3.2 | 5.1 | 3.4 | 4.0 |
| 3 | 1.6 | 3.0 | 2.6 | 1.6 | 1.3 | 1.5 |
| 4 | 1.9 | 2.1 | 2.2 | 2.9 | 2.7 | 3.1 |
| 5 | 1.9 | 1.9 | 2.8 | 2.1 | 4.0 | 2.0 |
| 6 | 3.0 | 1.7 | 2.2 | 3.8 | 3.9 | 3.3 |
| 7 | 2.5 | 2.4 | 2.8 | 3.5 | 7.4 | 4.0 |
| 8 | 2.3 | 2.0 | 1.6 | 1.8 | 1.8 | 8.5 |
| 9 | 2.7 | 2.0 | 2.0 | 1.8 | 2.0 | 1.8 |
| 10 | 1.4 | 2.5 | 1.7 | 1.9 | 0 | 1.9 |
| 11 | 2.4 | 2.7 | 3.4 | 2.9 | 5.3 | 3.0 |
| 12 | 1.7 | 1.6 | 1.7 | 2.7 | 2.6 | 3.7 |
| 13 | 2.3 | 1.7 | 1.7 | 1.5 | 2.3 | 3.0 |
| 14 | 1.7 | 2.6 | 2.2 | 1.6 | 1.9 | 1.7 |
| 15 | 3.4 | 2.3 | 3.3 | 2.5 | 2.3 | 2.3 |
| 16 | 1.6 | 1.7 | 1.8 | 0 | 2.8 | 2.0 |
| 17 | 2.5 | 1.9 | 3.9 | 0 | 0 | 8.8 |
| 18 | 2.0 | 1.6 | 1.4 | 1.6 | 1.8 | 8.4 |
| 19 | 2.6 | 2 | 1.5 | 1.5 | 2.0 | 1.6 |
| 20 | 8.0 | 4.5 | 6.8 | 3.5 | 4.0 | 3.7 |
| 21 | 2.0 | 2.0 | 2.0 | 2.0 | 2.6 | 3.0 |
| 22 | 2.0 | 1.9 | 1.8 | 2.0 | 8.6 | 3.0 |
| 23 | 1.6 | 3.6 | 2.2 | 1.5 | 1.8 | 1.8 |
| 24 | 1.6 | 1.9 | 5.7 | 2.0 | 2.4 | 3.5 |
| 25 | 1.4 | 2.2 | 1.8 | 1.3 | 1.5 | 1.5 |

Table S50

*Participants’ means and standard deviations per scenario for the hands-on-wheel time.*

| Hands-on-wheel time [s] | | | | | | |
| --- | --- | --- | --- | --- | --- | --- |
|  | Scenario 1 | Scenario 2 | Scenario 3 | Scenario 4 | Scenario 5 | Scenario 6 |
| Means | 1.87 | 1.95 | 2.29 | 2.18 | 2.90 | 2.66 |
| Standard deviation | 0.37 | 0.58 | 0.90 | 0.52 | 1.33 | 1.19 |

Table S51

*Results of repeated-measures ANOVA for the participants’ hands-on-wheel time.*

| Two-way repeated-measures ANOVA | | | | | | | | |
| --- | --- | --- | --- | --- | --- | --- | --- | --- |
| Effect of traffic density | | | Effect of time budget | | | Interaction | | |
| *F(1,24)* | *p* |  | *F(2,48)* | *p* |  | *F(2,48)* | *p* |  |
| 0.4 | 0.541 | 0.02 | 9.7 | <0.001 | 0.29 | 1.0 | 0.390 | 0.04 |

Table S52

*Pairwise comparisons of each scenario concerning the participants’ hands-on-wheel time using paired t-tests (Bonferroni correction: p < 0.003333 is significantly different).*

| Pairwise comparisons | *t* | *p* | significance |
| --- | --- | --- | --- |
| Scenario 1 vs. Scenario 2  Scenario 1 vs. Scenario 3  Scenario 1 vs. Scenario 4  Scenario 1 vs. Scenario 5  Scenario 1 vs. Scenario 6  Scenario 2 vs. Scenario 3  Scenario 2 vs. Scenario 4  Scenario 2 vs. Scenario 5  Scenario 2 vs. Scenario 6  Scenario 3 vs. Scenario 4  Scenario 3 vs. Scenario 5  Scenario 3 vs. Scenario 6  Scenario 4 vs. Scenario 5  Scenario 4 vs. Scenario 6  Scenario 5 vs. Scenario 6 | t(22) = -1.11  t(24) = -2.35  t(24) = -2.83  t(24) = -4.14  t(24) = -3.61  t(22) = -1.70  t(22) = -1.12  t(22) = -3.37  t(22) = -3.07  t(24) = 0.73  t(24) = -1.75  t(24) = -1.39  t(24) = -2.50  t(24) = -1.98  t(24) = 0.87 | 0.278  0.027  0.009  < 0.001  0.001  0.103  0.276  0.003  0.006  0.473  0.092  0.177  0.020  0.059  0.390 | not significant  not significant  not significant  significant  significant  not significant  not significant  significant  not significant  not significant  not significant  not significant  not significant  not significant  not significant |

Table S53

*All participants’ hands-on-wheel time raw data (25 participants x 6 scenarios).*

| Participant | Scenario 1 | Scenario 2 | Scenario 3 | Scenario 4 | Scenario 5 | Scenario 6 |
| --- | --- | --- | --- | --- | --- | --- |
| 1 | 2.29 | 2.41 | 2.45 | 1.9 | 2.3 | 1.74 |
| 2 | 2.31 | 4.19 | 3.18 | 2.33 | 4.24 | 5.61 |
| 3 | 2.10 | 2.36 | 1.52 | 2.55 | 7.31 | 3.70 |
| 4 | 1.66 | 1.87 | 1.74 | 2.41 | 2.39 | 2.17 |
| 5 | 1.46 | 1.52 | 2.09 | 2.28 | 2.61 | 1.64 |
| 6 | 1.98 | 1.67 | 3.32 | 2.87 | 2.15 | 0.01 |
| 7 | 1.96 | 2.01 | 1.47 | 1.8 | 1.95 | 2.36 |
| 8 | 1.62 | 1.44 | 2.42 | 1.93 | 1.42 | 1.56 |
| 9 | 2.30 | 1.78 | 1.89 | 2.67 | 4.33 | 3.44 |
| 10 | 1.18 | 1.59 | 1.43 | 1.40 | 4.10 | 1.93 |
| 11 | 2.15 | 1.37 | 2.42 | 1.45 | 3.37 | 3.98 |
| 12 | 1.85 | NaN | 2.00 | 2.76 | 2.98 | 2.30 |
| 13 | 1.51 | 2.13 | 2.49 | 1.94 | 2.65 | 1.66 |
| 14 | 1.35 | 1.46 | 1.92 | 2.25 | 2.63 | 2.37 |
| 15 | 1.66 | 1.97 | 1.82 | 1.76 | 1.67 | 2.26 |
| 16 | 1.72 | 1.89 | 1.66 | 1.87 | 1.82 | 2.94 |
| 17 | 2.05 | 1.78 | 1.85 | 1.74 | 3.33 | 2.76 |
| 18 | 1.94 | 2.42 | 2.31 | 2.50 | 2.61 | 2.77 |
| 19 | 2.09 | 1.60 | 2.03 | 2.63 | 1.43 | 1.42 |
| 20 | 1.74 | 2.00 | 5.83 | 3.35 | 1.63 | 4.18 |
| 21 | 2.33 | 2.40 | 2.84 | 1.41 | 4.98 | 2.13 |
| 22 | 1.87 | 1.84 | 2.43 | 2.32 | 2.53 | 3.82 |
| 23 | 2.68 | NaN | 2.45 | 2.93 | 3.81 | 4.67 |
| 24 | 1.28 | 1.53 | 1.38 | 1.50 | 2.51 | 2.73 |
| 25 | 1.69 | 1.73 | 2.40 | 1.96 | 1.84 | 2.37 |
